# Supplementary material for: ROCK Inhibition Promotes Attachment, Proliferation, and Wound Closure in Human Embryonic Stem Cell–Derived Retinal Pigmented Epithelium
Source: PubMed Central journal article supplement — Transl Vis Sci Technol. 2016 Nov 22;5(6):7. doi: 10.1167/tvst.5.6.7 (PMC5132148; doi:10.1167/tvst.5.6.7), 2016-11-22
Supplement: i2164-2591-5-6-7-s02.pdf [file i2164-2591-5-6-7-s02.pdf]

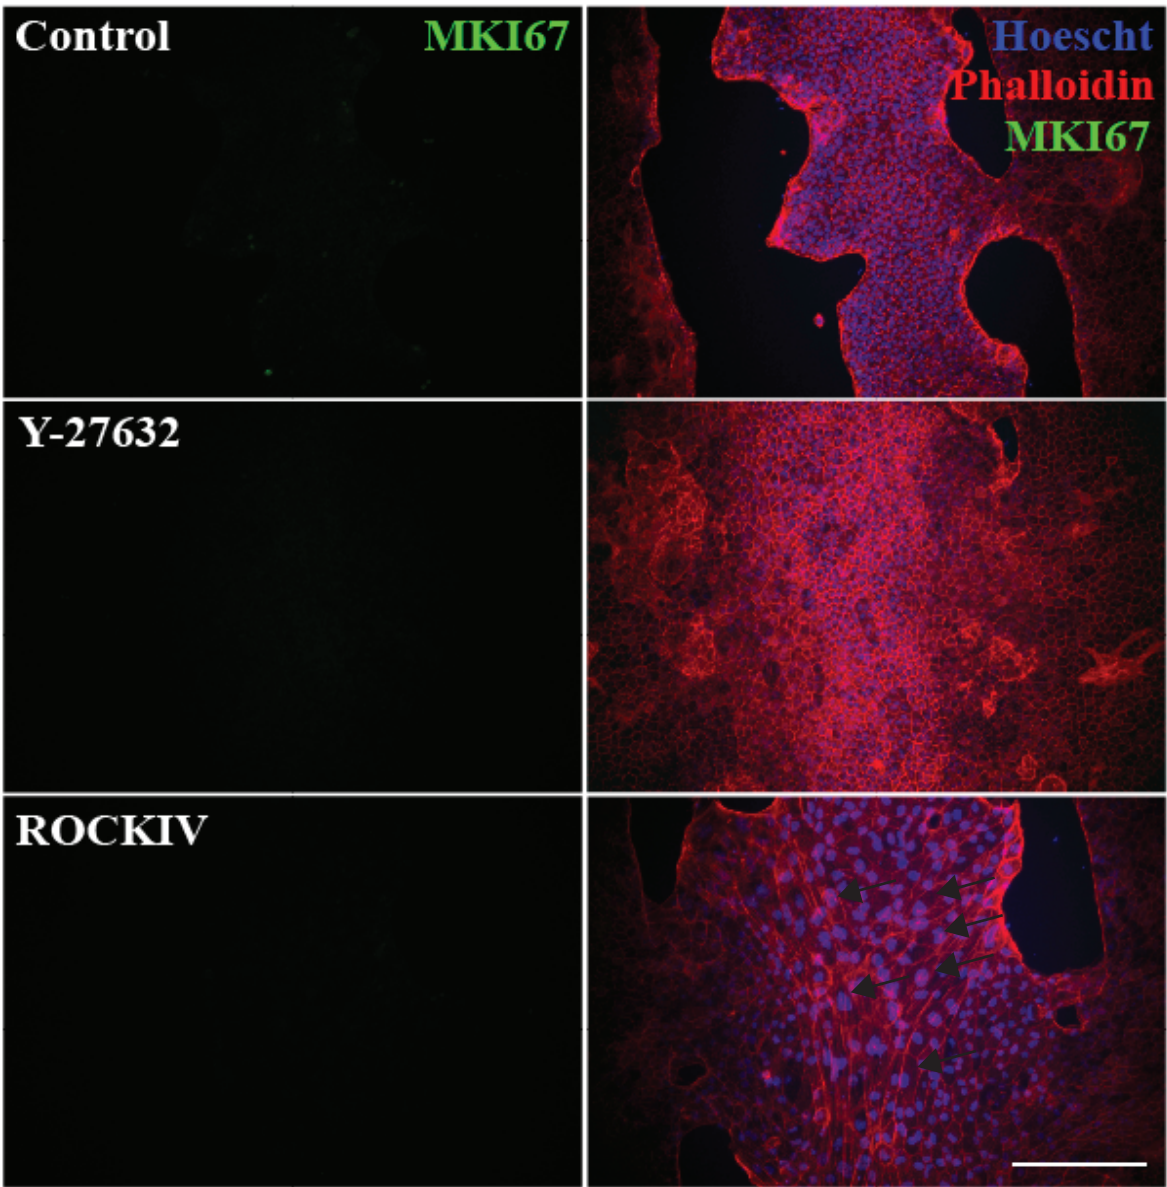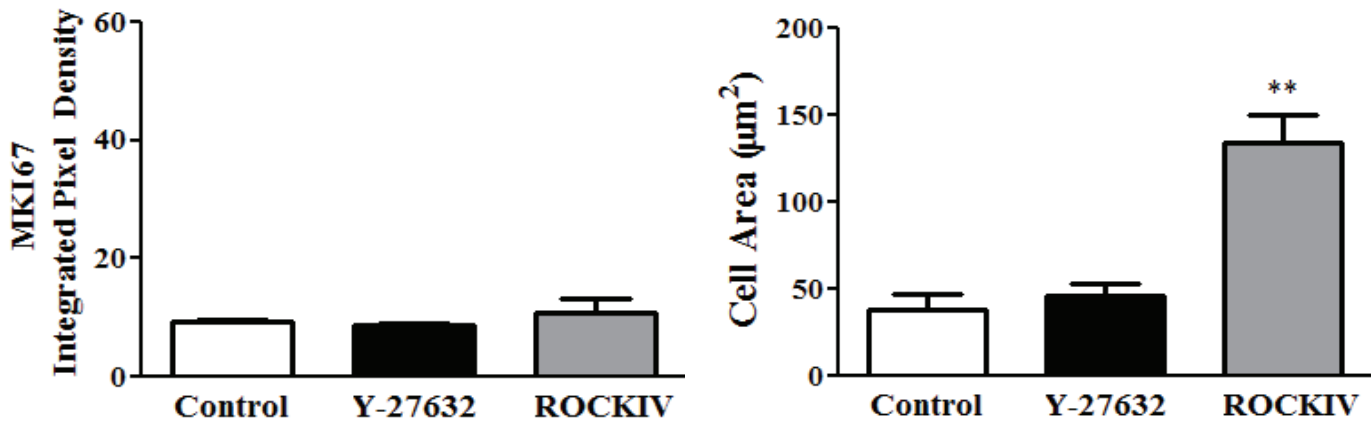

**Supplemental Figure 2.** 30 days post scratch there is no residual MKI67 expression, but persistent large cell area in ROCK2 inhibited cells. (A) Immunocytochemistry of MKI67 (marker of proliferation KI67, green), phalloidin (F-actin, red) and Hoescht (DNA, blue). Arrows indicate large cells. Scale bar = 100 $\mu\text{M}$ . (B) Quantification of MKI67 florescent intensity. (C) Determination of cell area 30 days post scratch. \*\* $p \leq 0.01$  to control. Error bars represent  $\pm$  SEM.  $n = 3$ .
